# Supplementary material for: On the Origins of Omicron’s Unique Spike Gene Insertion
Source: MDPI journal article supplement (doi:10.3390/vaccines10091509), 2022-09-09
Supplement: s1 [file s1]

# Supplemental Material

## Index:

Figure S1: Mutational burden of all SARS-CoV-2 proteins for the Omicron variant (B.1.1.529/BA.1/BA.2) compared with the Delta variant (B.1.617.2).

Figure S2: Possible nucleotide insertions giving rise to ins214EPE in the Omicron genome.

Figure S3: Alignment and normalized homology scores for regions flanking insertion and origin sequences for previously identified template switch-mediated insertions in the SARS-CoV-2 genome.

Figure S4: Distributions of normalized homology scores for regions flanking ins214EPE and candidate origin sequences.

Figure S5: Alignment of the Omicron genomic region corresponding to ins214EPE with the human TMEM245 transcript.

Figure S6: Occurrence of deletions and substitutions in the residues neighboring position 214, in SARS-CoV-2 genomes harboring any insertion at this position.

Table S1: Comparison of the mutations between the Omicron variant and previously identified variants of concern (VOCs) and variants of interest (VOIs).

Table S2: Number of PANGO lineages with mutations in the Omicron variant's Spike protein.

Table S3: List of other insertions near amino acid position 214 of the SARS-CoV-2 Spike glycoprotein.

Table S4: Prevalence of ins214EPE in Omicron sublineages.

Table S5: SARS-CoV-2 insertions identified and attributed to template switching in the previous analysis by Garushyants, et al.

Table S6: Sequences in the Omicron genome with a single nucleotide mismatch compared to the three candidate insertion sequences.

Table S7: Number of genomes with exact matches to candidate insertions by Pango lineage.

Table S8: Number of seasonal or enteric *Coronaviridae* genomes with exact matches to each candidate insertion sequence.

Table S9: Coexpression analysis of ACE2 and ANPEP in single cell RNA-sequencing datasets.

Table S10: Coexpression analysis of ACE2 and DPP4 in single cell RNA-sequencing datasets.

Table S11: Local alignment of 35 nucleotides upstream or downstream of origin and insertion sites from previously identified template switch-mediated insertions.

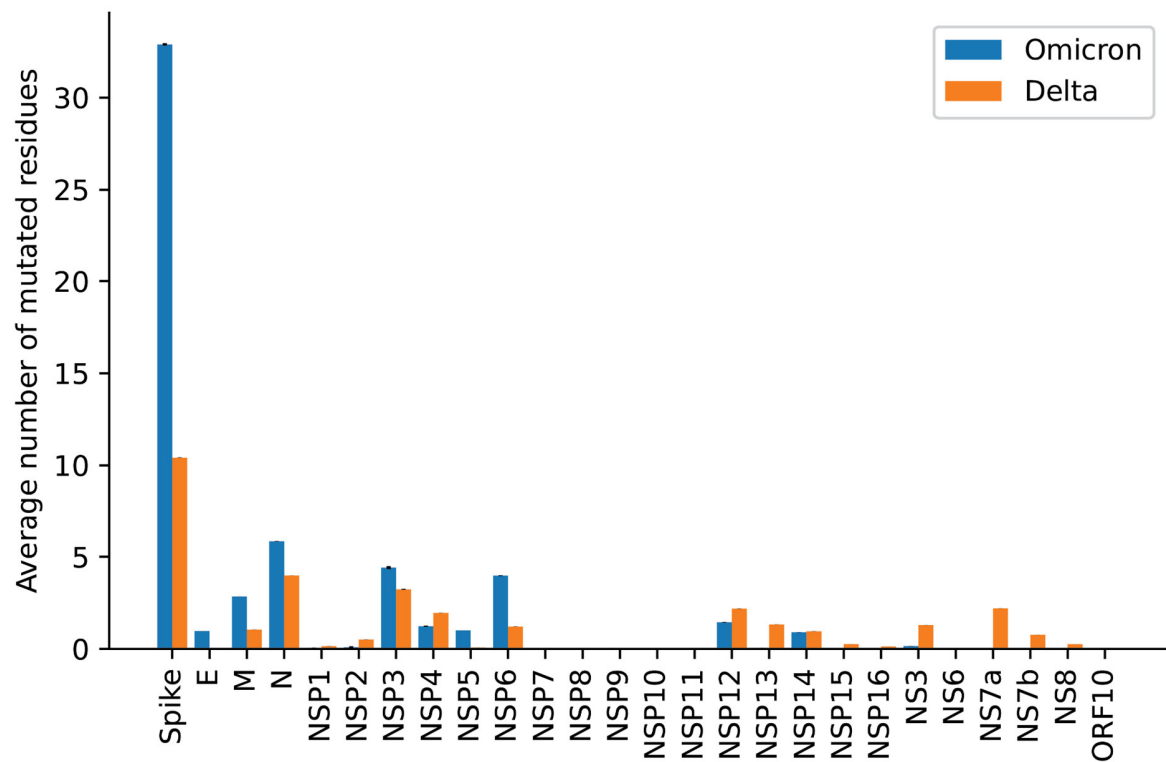

**Figure S1. Mutational burden of all SARS-CoV-2 proteins for the Omicron variant (B.1.1.529/BA.1/BA.2) compared with the Delta variant (B.1.617.2).** A total of 5,441 Omicron (B.1.1.529/BA.1/BA.2) sequences and 159,981 Delta (B.1.617.2) sequences were retrieved from the GISAID on December 16, 2021. Each bar represents the average number of mutations reported for a sequence in each of the SARS-CoV-2 proteins. Error bars represent the standard error of the mean.

|  |  |  |  |  |  |  |  |  |  |  |  |  |  |  |  |  |  |  |  |  |  |  |  |  |  |  |  |  |  |  |  |  |  |  |  |  |  |  |  |  |  |  |  |  |  |  |  |  |  |  |  |  |  |  |  |  |  |  |  |  |  |  |  |  |  |  |  |  |  |  |  |  |  |  |  |  |  |  |  |  |  |  |  |  |  |  |  |  |  |  |  |  |  |  |  |  |  |  |  |  |  |  |  |  |  |  |  |  |  |  |  |  |  |  |  |  |  |  |  |  |  |  |  |  |  |  |  |  |  |  |  |  |  |  |  |  |  |  |  |  |  |  |  |  |  |  |  |  |  |  |  |  |  |  |  |  |  |  |  |  |  |  |  |  |  |  |  |  |  |  |  |  |  |  |  |  |  |  |  |  |  |  |  |  |  |  |  |  |  |  |  |  |  |  |  |  |  |  |  |  |  |  |  |  |  |  |  |  |  |  |  |  |  |  |  |  |  |  |  |  |  |  |  |  |  |  |  |  |  |  |  |  |  |  |  |  |  |  |  |  |  |  |  |  |  |  |  |  |  |  |  |  |  |  |  |  |  |  |  |  |  |  |  |  |  |  |  |  |  |  |  |  |  |  |  |  |  |  |  |  |  |  |  |  |  |  |  |  |  |  |  |  |  |  |  |  |  |  |  |  |  |  |  |  |  |  |  |  |  |  |  |  |  |  |  |  |  |  |  |  |  |  |  |  |  |  |  |  |  |  |  |  |  |  |  |  |  |  |  |  |  |  |  |  |  |  |  |  |  |  |  |  |  |  |  |  |  |  |  |  |  |  |  |  |  |  |  |  |  |  |  |  |  |  |  |  |  |  |  |  |  |  |  |  |  |  |  |  |  |  |  |  |  |  |  |  |  |  |  |  |  |  |  |  |  |  |  |  |  |  |  |  |  |  |  |  |  |  |  |  |  |  |  |  |  |  |  |  |  |  |  |  |  |  |  |  |  |  |  |  |  |  |  |  |  |  |  |  |  |  |  |  |  |  |  |  |  |  |  |  |  |  |  |  |  |  |  |  |  |  |  |  |  |  |  |  |  |  |  |  |  |  |  |  |  |  |  |  |  |  |  |  |  |  |  |  |  |  |  |  |  |  |  |  |  |  |  |  |  |  |  |  |  |  |  |  |  |  |  |  |  |  |  |  |  |  |  |  |  |  |  |  |  |  |  |  |  |  |  |  |  |  |  |  |  |  |  |  |  |  |  |  |  |  |  |  |  |  |  |  |  |  |  |  |  |  |  |  |  |  |  |  |  |  |  |  |  |  |  |  |  |  |  |  |  |  |  |  |  |  |  |  |  |  |  |  |  |  |  |  |  |  |  |  |  |  |  |  |  |  |  |  |  |  |  |  |  |  |  |  |  |  |  |  |  |  |  |  |  |  |  |  |  |  |  |  |  |  |  |  |  |  |  |  |  |  |  |  |  |  |  |  |  |  |  |  |  |  |  |  |  |  |  |  |  |  |  |  |  |  |  |  |  |  |  |  |  |  |  |  |  |  |  |  |  |  |  |  |  |  |  |  |  |  |  |  |  |  |  |  |  |  |  |  |  |  |  |  |  |  |  |  |  |  |  |  |  |  |  |  |  |  |  |  |  |  |  |  |  |  |  |  |  |  |  |  |  |  |  |  |  |  |  |  |  |  |  |  |  |  |  |  |  |  |  |  |  |  |  |  |  |  |  |  |  |  |  |  |  |  |  |  |  |  |  |  |  |  |  |  |  |  |  |  |  |  |  |  |  |  |  |  |  |  |  |  |  |  |  |  |  |  |  |  |  |  |  |  |  |  |  |  |  |  |  |  |  |  |  |  |  |  |  |  |  |  |  |  |  |  |  |  |  |  |  |  |  |  |  |  |  |  |  |  |  |  |  |  |  |  |  |  |  |  |  |  |  |  |  |  |  |  |  |  |  |  |  |  |  |  |  |  |  |  |  |  |  |  |  |  |  |  |  |  |  |  |  |  |  |  |  |  |  |  |  |  |  |  |  |  |  |  |  |  |  |  |  |  |  |  |  |  |  |  |  |  |  |  |  |  |  |  |  |  |  |  |  |  |  |  |  |  |  |  |  |  |  |  |  |  |  |  |  |  |  |  |  |  |  |  |  |  |  |  |  |  |  |  |  |  |  |  |  |  |  |  |  |  |  |  |  |  |  |  |  |  |  |  |  |  |  |  |  |  |  |  |  |  |  |  |  |  |  |  |  |  |  |  |  |  |  |  |  |  |  |  |  |  |  |  |  |  |  |  |  |  |  |  |  |  |  |  |  |  |  |  |  |  |  |  |  |  |  |  |  |  |  |  |  |  |  |  |  |  |  |  |  |  |  |  |  |  |  |  |  |  |  |  |  |  |  |  |  |  |  |  |  |  |  |  |  |  |  |  |  |  |  |  |  |  |  |  |  |  |  |  |  |  |  |  |  |  |  |  |  |  |  |  |  |  |  |  |  |  |  |  |  |  |  |  |  |  |  |  |  |  |  |  |  |  |  |  |  |  |  |  |  |  |  |  |  |  |  |  |  |  |  |  |  |  |  |  |  |  |  |  |  |  |  |  |  |  |  |  |  |  |  |  |  |  |  |  |  |  |  |  |  |  |  |  |  |  |  |  |  |  |  |  |  |  |  |  |  |  |  |  |  |  |  |  |  |  |  |  |  |  |  |  |  |  |  |  |  |  |  |  |  |  |  |  |  |  |  |  |  |  |  |  |  |  |  |  |  |  |  |  |  |  |  |  |  |  |  |  |  |  |  |  |  |  |  |  |  |  |  |  |  |  |  |  |  |  |  |  |  |  |  |  |  |  |  |  |  |  |  |  |  |  |  |  |  |  |  |  |  |  |  |  |  |  |  |  |  |  |  |  |  |  |  |  |  |  |  |  |  |  |  |  |  |  |  |  |  |  |  |  |  |  |  |  |  |  |  |  |  |  |  |  |  |  |  |  |  |  |  |  |  |  |  |  |  |  |  |  |  |  |  |  |  |  |  |  |  |  |  |  |  |  |  |  |  |  |  |  |  |  |  |  |  |  |  |  |  |  |  |  |  |  |  |  |  |  |  |  |  |  |  |  |  |  |  |  |  |  |  |  |  |  |  |  |  |  |  |  |  |  |  |  |  |  |  |  |  |  |  |  |  |  |  |  |  |  |  |  |  |  |  |  |  |  |  |  |  |  |  |  |  |  |  |  |  |  |  |  |  |  |  |
|--|--|--|--|--|--|--|--|--|--|--|--|--|--|--|--|--|--|--|--|--|--|--|--|--|--|--|--|--|--|--|--|--|--|--|--|--|--|--|--|--|--|--|--|--|--|--|--|--|--|--|--|--|--|--|--|--|--|--|--|--|--|--|--|--|--|--|--|--|--|--|--|--|--|--|--|--|--|--|--|--|--|--|--|--|--|--|--|--|--|--|--|--|--|--|--|--|--|--|--|--|--|--|--|--|--|--|--|--|--|--|--|--|--|--|--|--|--|--|--|--|--|--|--|--|--|--|--|--|--|--|--|--|--|--|--|--|--|--|--|--|--|--|--|--|--|--|--|--|--|--|--|--|--|--|--|--|--|--|--|--|--|--|--|--|--|--|--|--|--|--|--|--|--|--|--|--|--|--|--|--|--|--|--|--|--|--|--|--|--|--|--|--|--|--|--|--|--|--|--|--|--|--|--|--|--|--|--|--|--|--|--|--|--|--|--|--|--|--|--|--|--|--|--|--|--|--|--|--|--|--|--|--|--|--|--|--|--|--|--|--|--|--|--|--|--|--|--|--|--|--|--|--|--|--|--|--|--|--|--|--|--|--|--|--|--|--|--|--|--|--|--|--|--|--|--|--|--|--|--|--|--|--|--|--|--|--|--|--|--|--|--|--|--|--|--|--|--|--|--|--|--|--|--|--|--|--|--|--|--|--|--|--|--|--|--|--|--|--|--|--|--|--|--|--|--|--|--|--|--|--|--|--|--|--|--|--|--|--|--|--|--|--|--|--|--|--|--|--|--|--|--|--|--|--|--|--|--|--|--|--|--|--|--|--|--|--|--|--|--|--|--|--|--|--|--|--|--|--|--|--|--|--|--|--|--|--|--|--|--|--|--|--|--|--|--|--|--|--|--|--|--|--|--|--|--|--|--|--|--|--|--|--|--|--|--|--|--|--|--|--|--|--|--|--|--|--|--|--|--|--|--|--|--|--|--|--|--|--|--|--|--|--|--|--|--|--|--|--|--|--|--|--|--|--|--|--|--|--|--|--|--|--|--|--|--|--|--|--|--|--|--|--|--|--|--|--|--|--|--|--|--|--|--|--|--|--|--|--|--|--|--|--|--|--|--|--|--|--|--|--|--|--|--|--|--|--|--|--|--|--|--|--|--|--|--|--|--|--|--|--|--|--|--|--|--|--|--|--|--|--|--|--|--|--|--|--|--|--|--|--|--|--|--|--|--|--|--|--|--|--|--|--|--|--|--|--|--|--|--|--|--|--|--|--|--|--|--|--|--|--|--|--|--|--|--|--|--|--|--|--|--|--|--|--|--|--|--|--|--|--|--|--|--|--|--|--|--|--|--|--|--|--|--|--|--|--|--|--|--|--|--|--|--|--|--|--|--|--|--|--|--|--|--|--|--|--|--|--|--|--|--|--|--|--|--|--|--|--|--|--|--|--|--|--|--|--|--|--|--|--|--|--|--|--|--|--|--|--|--|--|--|--|--|--|--|--|--|--|--|--|--|--|--|--|--|--|--|--|--|--|--|--|--|--|--|--|--|--|--|--|--|--|--|--|--|--|--|--|--|--|--|--|--|--|--|--|--|--|--|--|--|--|--|--|--|--|--|--|--|--|--|--|--|--|--|--|--|--|--|--|--|--|--|--|--|--|--|--|--|--|--|--|--|--|--|--|--|--|--|--|--|--|--|--|--|--|--|--|--|--|--|--|--|--|--|--|--|--|--|--|--|--|--|--|--|--|--|--|--|--|--|--|--|--|--|--|--|--|--|--|--|--|--|--|--|--|--|--|--|--|--|--|--|--|--|--|--|--|--|--|--|--|--|--|--|--|--|--|--|--|--|--|--|--|--|--|--|--|--|--|--|--|--|--|--|--|--|--|--|--|--|--|--|--|--|--|--|--|--|--|--|--|--|--|--|--|--|--|--|--|--|--|--|--|--|--|--|--|--|--|--|--|--|--|--|--|--|--|--|--|--|--|--|--|--|--|--|--|--|--|--|--|--|--|--|--|--|--|--|--|--|--|--|--|--|--|--|--|--|--|--|--|--|--|--|--|--|--|--|--|--|--|--|--|--|--|--|--|--|--|--|--|--|--|--|--|--|--|--|--|--|--|--|--|--|--|--|--|--|--|--|--|--|--|--|--|--|--|--|--|--|--|--|--|--|--|--|--|--|--|--|--|--|--|--|--|--|--|--|--|--|--|--|--|--|--|--|--|--|--|--|--|--|--|--|--|--|--|--|--|--|--|--|--|--|--|--|--|--|--|--|--|--|--|--|--|--|--|--|--|--|--|--|--|--|--|--|--|--|--|--|--|--|--|--|--|--|--|--|--|--|--|--|--|--|--|--|--|--|--|--|--|--|--|--|--|--|--|--|--|--|--|--|--|--|--|--|--|--|--|--|--|--|--|--|--|--|--|--|--|--|--|--|--|--|--|--|--|--|--|--|--|--|--|--|--|--|--|--|--|--|--|--|--|--|--|--|--|--|--|--|--|--|--|--|--|--|--|--|--|--|--|--|--|--|--|--|--|--|--|--|--|--|--|--|--|--|--|--|--|--|--|--|--|--|--|--|--|--|--|--|--|--|--|--|--|--|--|--|--|--|--|--|--|--|--|--|--|--|--|--|--|--|--|--|--|--|--|--|--|--|--|--|--|--|--|--|--|--|--|--|--|--|--|--|--|--|--|--|--|--|--|--|--|--|--|--|--|--|--|--|--|--|--|--|--|--|--|--|--|--|--|--|--|--|--|--|--|--|--|--|--|--|--|--|--|--|--|--|--|--|--|--|--|--|--|--|--|--|--|--|--|--|--|--|--|--|--|--|--|--|--|--|--|--|--|--|--|--|--|--|--|--|--|--|--|--|--|--|--|--|--|--|--|--|--|--|--|--|--|--|--|--|--|--|--|--|--|--|--|--|--|--|--|--|--|--|--|--|--|--|--|--|--|--|--|--|--|--|--|--|--|--|--|--|--|--|--|--|--|--|--|--|--|--|--|--|--|--|--|--|--|--|--|--|--|--|--|--|--|--|--|--|--|--|--|--|--|--|--|--|--|--|--|--|--|--|--|--|--|--|--|--|--|--|--|--|--|--|--|--|--|--|--|--|--|--|--|--|--|--|--|--|--|--|--|--|--|--|--|--|--|--|--|--|--|--|--|--|--|--|--|--|--|--|--|--|--|--|--|--|--|--|--|--|--|--|--|--|--|--|--|--|--|--|--|--|
|  |  |  |  |  |  |  |  |  |  |  |  |  |  |  |  |  |  |  |  |  |  |  |  |  |  |  |  |  |  |  |  |  |  |  |  |  |  |  |  |  |  |  |  |  |  |  |  |  |  |  |  |  |  |  |  |  |  |  |  |  |  |  |  |  |  |  |  |  |  |  |  |  |  |  |  |  |  |  |  |  |  |  |  |  |  |  |  |  |  |  |  |  |  |  |  |  |  |  |  |  |  |  |  |  |  |  |  |  |  |  |  |  |  |  |  |  |  |  |  |  |  |  |  |  |  |  |  |  |  |  |  |  |  |  |  |  |  |  |  |  |  |  |  |  |  |  |  |  |  |  |  |  |  |  |  |  |  |  |  |  |  |  |  |  |  |  |  |  |  |  |  |  |  |  |  |  |  |  |  |  |  |  |  |  |  |  |  |  |  |  |  |  |  |  |  |  |  |  |  |  |  |  |  |  |  |  |  |  |  |  |  |  |  |  |  |  |  |  |  |  |  |  |  |  |  |  |  |  |  |  |  |  |  |  |  |  |  |  |  |  |  |  |  |  |  |  |  |  |  |  |  |  |  |  |  |  |  |  |  |  |  |  |  |  |  |  |  |  |  |  |  |  |  |  |  |  |  |  |  |  |  |  |  |  |  |  |  |  |  |  |  |  |  |  |  |  |  |  |  |  |  |  |  |  |  |  |  |  |  |  |  |  |  |  |  |  |  |  |  |  |  |  |  |  |  |  |  |  |  |  |  |  |  |  |  |  |  |  |  |  |  |  |  |  |  |  |  |  |  |  |  |  |  |  |  |  |  |  |  |  |  |  |  |  |  |  |  |  |  |  |  |  |  |  |  |  |  |  |  |  |  |  |  |  |  |  |  |  |  |  |  |  |  |  |  |  |  |  |  |  |  |  |  |  |  |  |  |  |  |  |  |  |  |  |  |  |  |  |  |  |  |  |  |  |  |  |  |  |  |  |  |  |  |  |  |  |  |  |  |  |  |  |  |  |  |  |  |  |  |  |  |  |  |  |  |  |  |  |  |  |  |  |  |  |  |  |  |  |  |  |  |  |  |  |  |  |  |  |  |  |  |  |  |  |  |  |  |  |  |  |  |  |  |  |  |  |  |  |  |  |  |  |  |  |  |  |  |  |  |  |  |  |  |  |  |  |  |  |  |  |  |  |  |  |  |  |  |  |  |  |  |  |  |  |  |  |  |  |  |  |  |  |  |  |  |  |  |  |  |  |  |  |  |  |  |  |  |  |  |  |  |  |  |  |  |  |  |  |  |  |  |  |  |  |  |  |  |  |  |  |  |  |  |  |  |  |  |  |  |  |  |  |  |  |  |  |  |  |  |  |  |  |  |  |  |  |  |  |  |  |  |  |  |  |  |  |  |  |  |  |  |  |  |  |  |  |  |  |  |  |  |  |  |  |  |  |  |  |  |  |  |  |  |  |  |  |  |  |  |  |  |  |  |  |  |  |  |  |  |  |  |  |  |  |  |  |  |  |  |  |  |  |  |  |  |  |  |  |  |  |  |  |  |  |  |  |  |  |  |  |  |  |  |  |  |  |  |  |  |  |  |  |  |  |  |  |  |  |  |  |  |  |  |  |  |  |  |  |  |  |  |  |  |  |  |  |  |  |  |  |  |  |  |  |  |  |  |  |  |  |  |  |  |  |  |  |  |  |  |  |  |  |  |  |  |  |  |  |  |  |  |  |  |  |  |  |  |  |  |  |  |  |  |  |  |  |  |  |  |  |  |  |  |  |  |  |  |  |  |  |  |  |  |  |  |  |  |  |  |  |  |  |  |  |  |  |  |  |  |  |  |  |  |  |  |  |  |  |  |  |  |  |  |  |  |  |  |  |  |  |  |  |  |  |  |  |  |  |  |  |  |  |  |  |  |  |  |  |  |  |  |  |  |  |  |  |  |  |  |  |  |  |  |  |  |  |  |  |  |  |  |  |  |  |  |  |  |  |  |  |  |  |  |  |  |  |  |  |  |  |  |  |  |  |  |  |  |  |  |  |  |  |  |  |  |  |  |  |  |  |  |  |  |  |  |  |  |  |  |  |  |  |  |  |  |  |  |  |  |  |  |  |  |  |  |  |  |  |  |  |  |  |  |  |  |  |  |  |  |  |  |  |  |  |  |  |  |  |  |  |  |  |  |  |  |  |  |  |  |  |  |  |  |  |  |  |  |  |  |  |  |  |  |  |  |  |  |  |  |  |  |  |  |  |  |  |  |  |  |  |  |  |  |  |  |  |  |  |  |  |  |  |  |  |  |  |  |  |  |  |  |  |  |  |  |  |  |  |  |  |  |  |  |  |  |  |  |  |  |  |  |  |  |  |  |  |  |  |  |  |  |  |  |  |  |  |  |  |  |  |  |  |  |  |  |  |  |  |  |  |  |  |  |  |  |  |  |  |  |  |  |  |  |  |  |  |  |  |  |  |  |  |  |  |  |  |  |  |  |  |  |  |  |  |  |  |  |  |  |  |  |  |  |  |  |  |  |  |  |  |  |  |  |  |  |  |  |  |  |  |  |  |  |  |  |  |  |  |  |  |  |  |  |  |  |  |  |  |  |  |  |  |  |  |  |  |  |  |  |  |  |  |  |  |  |  |  |  |  |  |  |  |  |  |  |  |  |  |  |  |  |  |  |  |  |  |  |  |  |  |  |  |  |  |  |  |  |  |  |  |  |  |  |  |  |  |  |  |  |  |  |  |  |  |  |  |  |  |  |  |  |  |  |  |  |  |  |  |  |  |  |  |  |  |  |  |  |  |  |  |  |  |  |  |  |  |  |  |  |  |  |  |  |  |  |  |  |  |  |  |  |  |  |  |  |  |  |  |  |  |  |  |  |  |  |  |  |  |  |  |  |  |  |  |  |  |  |  |  |  |  |  |  |  |  |  |  |  |  |  |  |  |  |  |  |  |  |  |  |  |  |  |  |  |  |  |  |  |  |  |  |  |  |  |  |  |  |  |  |  |  |  |  |  |  |  |  |  |  |  |  |  |  |  |  |  |  |  |  |  |  |  |  |  |  |  |  |  |  |  |  |  |  |  |  |  |  |  |  |  |  |  |  |  |  |  |  |  |  |  |  |  |  |  |  |  |  |  |  |  |  |  |  |  |  |  |  |  |  |  |  |  |  |  |  |  |  |  |  |  |  |  |  |  |  |  |  |  |  |  |  |  |  |  |  |  |  |  |  |  |  |  |  |  |  |  |  |
|--|--|--|--|--|--|--|--|--|--|--|--|--|--|--|--|--|--|--|--|--|--|--|--|--|--|--|--|--|--|--|--|--|--|--|--|--|--|--|--|--|--|--|--|--|--|--|--|--|--|--|--|--|--|--|--|--|--|--|--|--|--|--|--|--|--|--|--|--|--|--|--|--|--|--|--|--|--|--|--|--|--|--|--|--|--|--|--|--|--|--|--|--|--|--|--|--|--|--|--|--|--|--|--|--|--|--|--|--|--|--|--|--|--|--|--|--|--|--|--|--|--|--|--|--|--|--|--|--|--|--|--|--|--|--|--|--|--|--|--|--|--|--|--|--|--|--|--|--|--|--|--|--|--|--|--|--|--|--|--|--|--|--|--|--|--|--|--|--|--|--|--|--|--|--|--|--|--|--|--|--|--|--|--|--|--|--|--|--|--|--|--|--|--|--|--|--|--|--|--|--|--|--|--|--|--|--|--|--|--|--|--|--|--|--|--|--|--|--|--|--|--|--|--|--|--|--|--|--|--|--|--|--|--|--|--|--|--|--|--|--|--|--|--|--|--|--|--|--|--|--|--|--|--|--|--|--|--|--|--|--|--|--|--|--|--|--|--|--|--|--|--|--|--|--|--|--|--|--|--|--|--|--|--|--|--|--|--|--|--|--|--|--|--|--|--|--|--|--|--|--|--|--|--|--|--|--|--|--|--|--|--|--|--|--|--|--|--|--|--|--|--|--|--|--|--|--|--|--|--|--|--|--|--|--|--|--|--|--|--|--|--|--|--|--|--|--|--|--|--|--|--|--|--|--|--|--|--|--|--|--|--|--|--|--|--|--|--|--|--|--|--|--|--|--|--|--|--|--|--|--|--|--|--|--|--|--|--|--|--|--|--|--|--|--|--|--|--|--|--|--|--|--|--|--|--|--|--|--|--|--|--|--|--|--|--|--|--|--|--|--|--|--|--|--|--|--|--|--|--|--|--|--|--|--|--|--|--|--|--|--|--|--|--|--|--|--|--|--|--|--|--|--|--|--|--|--|--|--|--|--|--|--|--|--|--|--|--|--|--|--|--|--|--|--|--|--|--|--|--|--|--|--|--|--|--|--|--|--|--|--|--|--|--|--|--|--|--|--|--|--|--|--|--|--|--|--|--|--|--|--|--|--|--|--|--|--|--|--|--|--|--|--|--|--|--|--|--|--|--|--|--|--|--|--|--|--|--|--|--|--|--|--|--|--|--|--|--|--|--|--|--|--|--|--|--|--|--|--|--|--|--|--|--|--|--|--|--|--|--|--|--|--|--|--|--|--|--|--|--|--|--|--|--|--|--|--|--|--|--|--|--|--|--|--|--|--|--|--|--|--|--|--|--|--|--|--|--|--|--|--|--|--|--|--|--|--|--|--|--|--|--|--|--|--|--|--|--|--|--|--|--|--|--|--|--|--|--|--|--|--|--|--|--|--|--|--|--|--|--|--|--|--|--|--|--|--|--|--|--|--|--|--|--|--|--|--|--|--|--|--|--|--|--|--|--|--|--|--|--|--|--|--|--|--|--|--|--|--|--|--|--|--|--|--|--|--|--|--|--|--|--|--|--|--|--|--|--|--|--|--|--|--|--|--|--|--|--|--|--|--|--|--|--|--|--|--|--|--|--|--|--|--|--|--|--|--|--|--|--|--|--|--|--|--|--|--|--|--|--|--|--|--|--|--|--|--|--|--|--|--|--|--|--|--|--|--|--|--|--|--|--|--|--|--|--|--|--|--|--|--|--|--|--|--|--|--|--|--|--|--|--|--|--|--|--|--|--|--|--|--|--|--|--|--|--|--|--|--|--|--|--|--|--|--|--|--|--|--|--|--|--|--|--|--|--|--|--|--|--|--|--|--|--|--|--|--|--|--|--|--|--|--|--|--|--|--|--|--|--|--|--|--|--|--|--|--|--|--|--|--|--|--|--|--|--|--|--|--|--|--|--|--|--|--|--|--|--|--|--|--|--|--|--|--|--|--|--|--|--|--|--|--|--|--|--|--|--|--|--|--|--|--|--|--|--|--|--|--|--|--|--|--|--|--|--|--|--|--|--|--|--|--|--|--|--|--|--|--|--|--|--|--|--|--|--|--|--|--|--|--|--|--|--|--|--|--|--|--|--|--|--|--|--|--|--|--|--|--|--|--|--|--|--|--|--|--|--|--|--|--|--|--|--|--|--|--|--|--|--|--|--|--|--|--|--|--|--|--|--|--|--|--|--|--|--|--|--|--|--|--|--|--|--|--|--|--|--|--|--|--|--|--|--|--|--|--|--|--|--|--|--|--|--|--|--|--|--|--|--|--|--|--|--|--|--|--|--|--|--|--|--|--|--|--|--|--|--|--|--|--|--|--|--|--|--|--|--|--|--|--|--|--|--|--|--|--|--|--|--|--|--|--|--|--|--|--|--|--|--|--|--|--|--|--|--|--|--|--|--|--|--|--|--|--|--|--|--|--|--|--|--|--|--|--|--|--|--|--|--|--|--|--|--|--|--|--|--|--|--|--|--|--|--|--|--|--|--|--|--|--|--|--|--|--|--|--|--|--|--|--|--|--|--|--|--|--|--|--|--|--|--|--|--|--|--|--|--|--|--|--|--|--|--|--|--|--|--|--|--|--|--|--|--|--|--|--|--|--|--|--|--|--|--|--|--|--|--|--|--|--|--|--|--|--|--|--|--|--|--|--|--|--|--|--|--|--|--|--|--|--|--|--|--|--|--|--|--|--|--|--|--|--|--|--|--|--|--|--|--|--|--|--|--|--|--|--|--|--|--|--|--|--|--|--|--|--|--|--|--|--|--|--|--|--|--|--|--|--|--|--|--|--|--|--|--|--|--|--|--|--|--|--|--|--|--|--|--|--|--|--|--|--|--|--|--|--|--|--|--|--|--|--|--|--|--|--|--|--|--|--|--|--|--|--|--|--|--|--|--|--|--|--|--|--|--|--|--|--|--|--|--|--|--|--|--|--|--|--|--|--|--|--|--|--|--|--|--|--|--|--|--|--|--|--|--|--|--|--|--|--|--|--|--|--|--|--|--|--|--|--|--|--|--|--|--|--|--|--|--|--|--|--|--|--|--|--|--|--|--|--|--|--|--|--|--|--|--|--|--|--|--|--|--|--|--|--|--|--|--|--|--|--|--|--|--|--|--|--|--|--|--|--|--|--|--|--|--|--|--|--|--|--|--|--|--|--|--|--|--|--|--|--|--|--|--|--|--|

**Figure S2. Possible nucleotide insertions giving rise to ins214EPE in the Omicron genome.** There are three possible scenarios in which a 9-nucleotide insertion could yield the observed sequence. Because of the local sequence alignment (i.e. the occurrence of the insertion at a 5'-GA-3' and the presence of a 5'-GA-3' on either side of the insertion), it cannot be determined which scenario actually gave rise to the insertion.

### A Alignment of flanking regions for previously identified template switch-mediated insertions

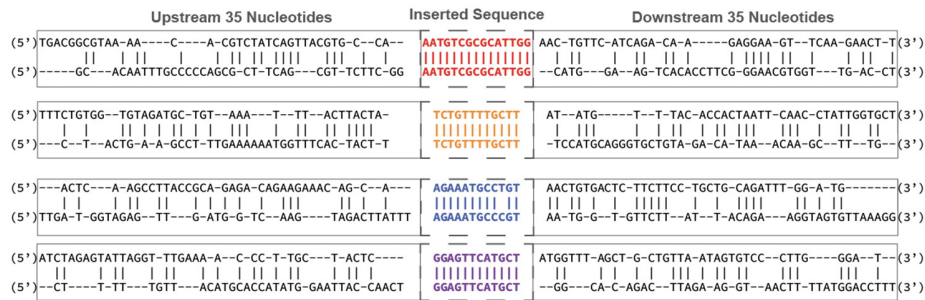

### B Normalized homology scores for regions flanking template switch-mediated insertions compared to the null distribution for random pairs of equal sized SARS-CoV-2 sequences

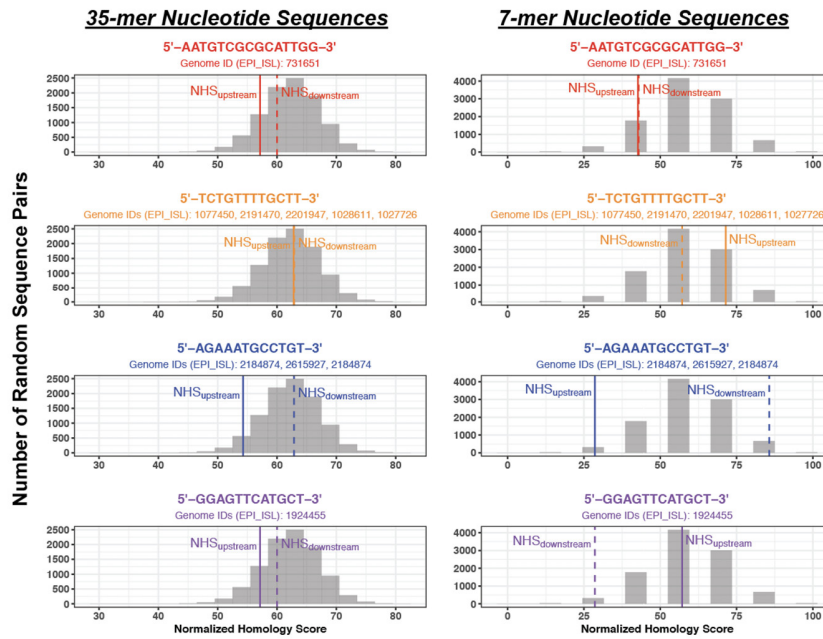

**Figure S3. Alignment and normalized homology scores for regions flanking insertion and origin sequences for previously identified template switch-mediated insertions in the SARS-CoV-2 genome.** Four “positive control” template switch-mediated insertions of 12 to 15 nucleotides were identified from the previous analysis by Garushyants et al.<sup>14</sup> We identified the corresponding SARS-CoV-2 genomes in GISAID for each insertion. (A) Alignment of the insertion (top) and origin (bottom) sites for the 35 nucleotides upstream and downstream of each inserted sequence. These alignments are also shown in **Table S8** for each individual genome. (B) For a given insertion, we then calculated normalized homology scores (NHS) between the regions flanking the inserted sequence and the origin (template) sequence. Specifically, we compared the 35 nucleotides upstream of the insertion to the 35 nucleotides upstream of the origin (“NHS<sub>upstream</sub>”), and we separately compared the 35 nucleotides downstream of the insertion to the 35 nucleotides downstream of the origin (“NHS<sub>downstream</sub>”) (panel on left). We did the same to compare 7-nucleotide sequences upstream and downstream of the insertion and origin (panel on right). In each case, the normalized homology scores are shown for each insertion as vertical lines (solid line for upstream, and dashed line for downstream) on top of a control null distribution (gray histogram). The numerical scores are given in **Table S8**. To generate the null distributions of NHS values, we compared 10,000 pairs of non-

overlapping 35-nucleotide (or 7-nucleotide) sequences from the original SARS-CoV-2 genome (NC\_045512.2).<sup>79</sup>

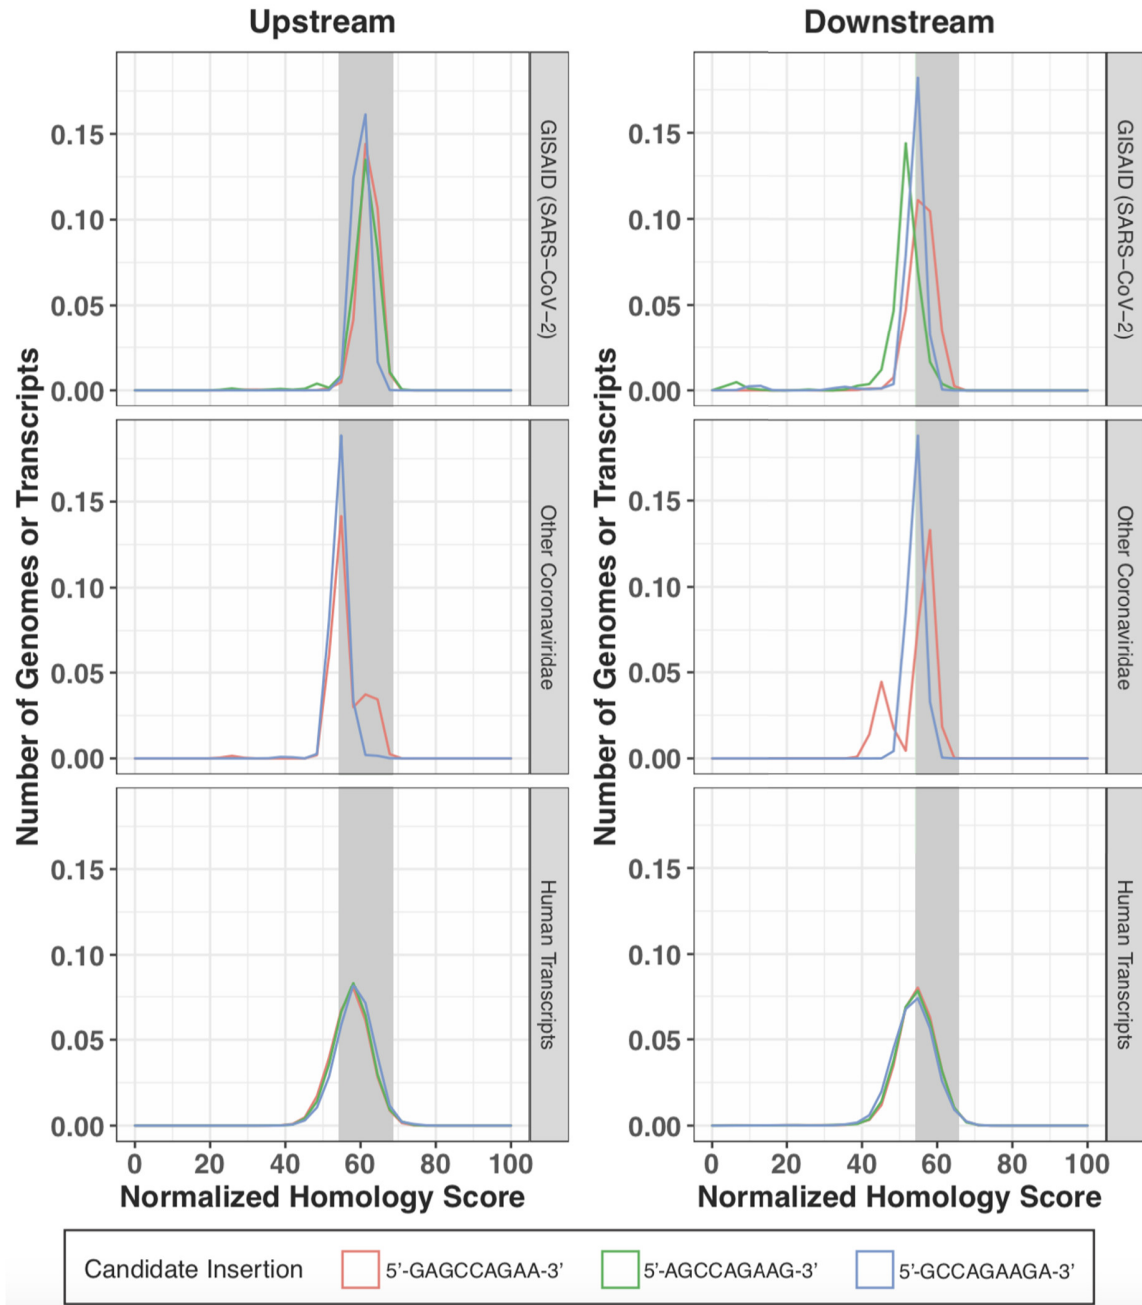

**Figure S4. Distributions of normalized homology scores for regions flanking ins214EPE and candidate origin sequences.** Distributions of normalized homology score (NHS) values between the regions flanking the Omicron insertion and the regions flanking the candidate origin sequences from SARS-CoV-2 genomes in GISAID (top), non-SARS-CoV-2 *Coronaviridae* genomes (middle), and human transcripts (bottom). Distributions are shown separately for the comparisons of nucleotide sequences upstream and downstream

of the Omicron insertion and the respective putative templates. The gray box in each plot corresponds to the 5th to 95th percentile of the NHS distribution comparing randomly selected non-overlapping 35-nucleotide sequences from the SARS-CoV-2 genome (i.e. the histogram shown in each panel of Figure S3).

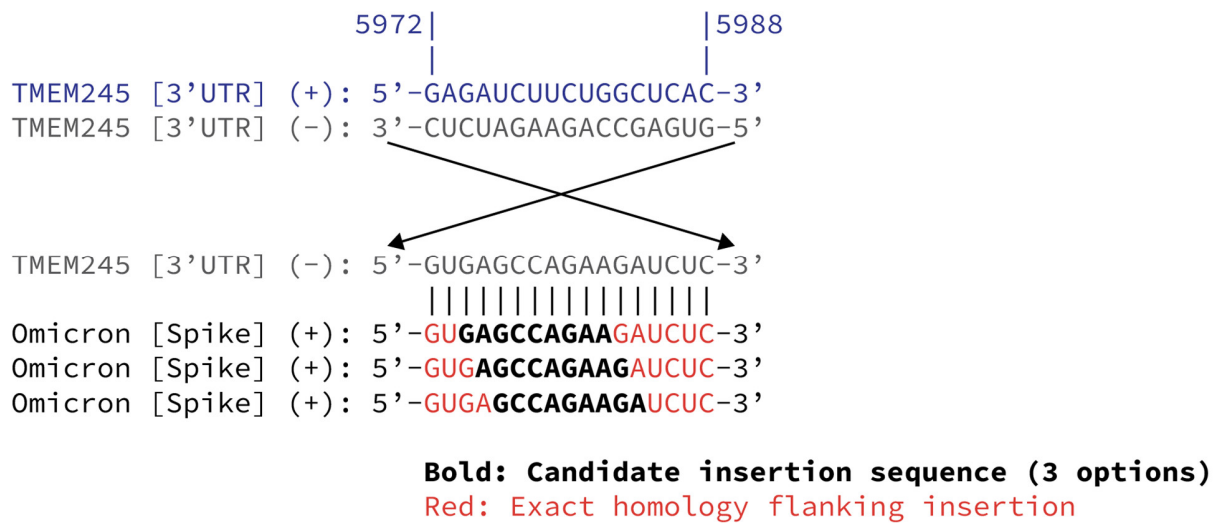

**Figure S5. Alignment of the Omicron genomic region corresponding to ins214EPE with the human TMEM245 transcript.** TMEM245 is an example of a human transcript which harbors the sequence that corresponds to ins214EPE and has exact homology in the short nucleotide sequences upstream and downstream of it. The relevant region of the TMEM245 transcript (nucleotides 5972 to 5988), which is present in the 3' untranslated region (3' UTR), is shown in blue. The reverse complement of this sequence is shown in gray, first in the 3' to 5' orientation and then flipped to visualize the 5' to 3' orientation from left to right. This sequence aligns exactly with the region corresponding to and surrounding ins214EPE in the Omicron genome. The three rows corresponding to the Omicron genome show identical sequences, but consider the three different candidate insertions that may have given rise to ins214EPE (see Figure S2). In each row, the candidate insertion sequence is shown in bold, and the flanking nucleotides are shown in red.



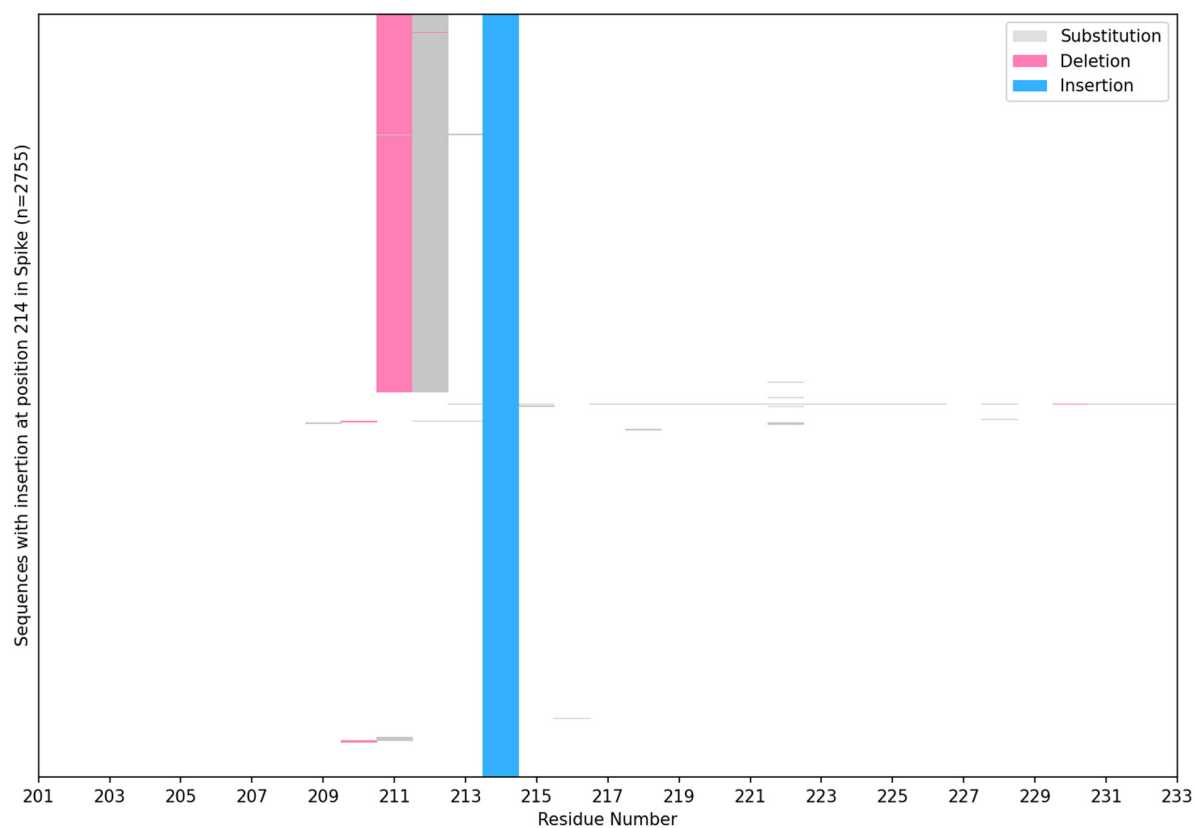

**Figure S6. Occurrence of deletions and substitutions in the residues neighboring position 214, in SARS-CoV-2 genomes harboring any insertion at this position.** Among all 2755 SARS-CoV-2 sequences in GISAID with any insertion at position 214 (as of December 14, 2021), we assessed the neighboring residues for the occurrence of deletions, substitutions, or other insertions. The sequences with a deletion observed at position 1358 all correspond to the Omicron variant (two sequences lack assigned lineages and one is assigned to a parent lineage), whereas other sequences containing alternate insertions at position 214 (i.e. not ins214EPE) generally have no alterations in the neighboring regions.

**Table S1. Comparison of the mutations between the Omicron variant and previously identified variants of concern (VOCs) and variants of interest (VOIs).** Core mutations for non-Omicron lineages were derived from the Coronavirus Antiviral Research Database (CoV-RDB). There are 26 mutations in Omicron which are not considered core mutations for any previously identify variants of concern. Among these, two were present in variants of interest (A67V and T95I) and 23 were present in another SARS-CoV-2 lineage that was not classified as a VOC or VOI (not shown in this table). Only ins214EPE was never observed in any SARS-CoV-2 sequences deposited in GISAID prior to the identification of Omicron. The first column denotes the protein domain where the mutation is present. NTD: N-terminal domain; RBD: receptor binding domain; RBM: receptor binding motif; PBCS: poly-basic cleavage site; CTD: C-terminal domain.

| Domains | Position(s) | Surge Associated? | Omicron (B.1.1.529) | Alpha (B.1.1.7) | Beta (B.1.351) | Gamma (P.1) | Delta (B.1.617.2) | Lambda (C.37) | Mu (B.1.621) | Eta (B.1.525) | Iota (B.1.526) | Kappa (B.1.617.1) |
|---------|-------------|-------------------|---------------------|-----------------|----------------|-------------|-------------------|---------------|--------------|---------------|----------------|-------------------|
| NTD     | 5           | Yes               |                     |                 |                |             |                   |               |              |               | L5F            |                   |
|         | 18          | Yes               |                     |                 |                | L18F        |                   |               |              |               |                |                   |
|         | 19          | Yes               |                     |                 |                |             | T19R              |               |              |               |                |                   |
|         | 20          | Yes               |                     |                 |                | T20N        |                   |               |              |               |                |                   |
|         | 26          | Yes               |                     |                 |                | P26S        |                   |               |              |               |                |                   |
|         | 52          | No                |                     |                 |                |             |                   |               |              | Q52R          |                |                   |
|         | 67          | Yes               | A67V                |                 |                |             |                   |               |              | A67V          |                |                   |
|         | 69          | Yes               | H69del              | H69del          |                |             |                   |               |              | H69del        |                |                   |
|         | 70          | Yes               | V70del              | V70del          |                |             |                   |               |              | V70del        |                |                   |
|         | 75          | No                |                     |                 |                |             |                   | G75V          |              |               |                |                   |
|         | 76          | No                |                     |                 |                |             |                   | T76I          |              |               |                |                   |
|         | 80          | Yes               |                     |                 | D80A           |             |                   |               |              |               |                |                   |
|         | 95          | Yes               | T95I                |                 |                |             |                   |               | T95I         |               | T95I           |                   |
|         | 138         | Yes               |                     |                 |                | D138Y       |                   |               |              |               |                |                   |
|         | 142         | Yes               | G142D               |                 |                |             | G142D             |               |              |               |                |                   |
|         | 143         | Yes               | V143del             |                 |                |             |                   |               |              |               |                |                   |
|         | 144         | Yes               | Y144del             | Y144del         |                |             |                   |               | Y144S        | Y144del       |                |                   |
|         | 145         | Yes               | Y145del             | Y145del         |                |             |                   |               | Y145N        | Y145del       |                |                   |
|         | 156         | Yes               |                     |                 |                |             | E156G             |               |              |               |                |                   |
|         | 157         | Yes               |                     |                 |                |             | F157del           |               |              |               |                |                   |
|         | 158         | Yes               |                     |                 |                |             | R158del           |               |              |               |                |                   |
|         | 190         | Yes               |                     |                 |                | R190S       |                   |               |              |               |                |                   |
|         | 211         | No                | N211del             |                 |                |             |                   |               |              |               |                |                   |
|         | 212         | No                | L212I               |                 |                |             |                   |               |              |               |                |                   |
|         | 214         | No                | R214ins EPE         |                 |                |             |                   |               |              |               |                |                   |
|         | 215         | Yes               |                     |                 | D215G          |             |                   |               |              |               |                |                   |
|         | 241         | No                |                     |                 | L241del        |             |                   |               |              |               |                |                   |
|         | 242         | Yes               |                     |                 | L242del        |             |                   |               |              |               |                |                   |
|         | 243         | Yes               |                     |                 | A243del        |             |                   |               |              |               |                |                   |
|         | 246         | Yes               |                     |                 |                |             |                   | R246N         |              |               |                |                   |
|         | 247         | Yes               |                     |                 |                |             |                   | S247del       |              |               |                |                   |



|  |      |     |       |        |  |        |       |       |       |       |  |        |
|--|------|-----|-------|--------|--|--------|-------|-------|-------|-------|--|--------|
|  | 859  | Yes |       |        |  |        |       | T859N |       |       |  |        |
|  | 888  | No  |       |        |  |        |       |       |       | F888L |  |        |
|  | 950  | Yes |       |        |  |        | D950N |       | D950N |       |  |        |
|  | 954  | No  | Q954H |        |  |        |       |       |       |       |  |        |
|  | 969  | No  | N969K |        |  |        |       |       |       |       |  |        |
|  | 981  | No  | L981F |        |  |        |       |       |       |       |  |        |
|  | 982  | Yes |       | S982A  |  |        |       |       |       |       |  |        |
|  | 1027 | Yes |       |        |  | T1027I |       |       |       |       |  |        |
|  | 1071 | No  |       |        |  |        |       |       |       |       |  | Q1071H |
|  | 1118 | Yes |       | D1118H |  |        |       |       |       |       |  |        |
|  | 1176 | Yes |       |        |  | V1176F |       |       |       |       |  |        |

**Table S2. Number of PANGO lineages with mutations in the Omicron variant's Spike protein.** The Omicron sequences deposited on November 24, 2021 that were assigned B.1 are not being considered.

| AA Substitutions       | Number of Pango lineage in which mutation has observed As of 14 Dec 2021 |
|------------------------|--------------------------------------------------------------------------|
| Spike_A67V             | 269                                                                      |
| Spike_H69del           | 374                                                                      |
| Spike_V70del           | 374                                                                      |
| Spike_T95I             | 505                                                                      |
| Spike_G142D            | 256                                                                      |
| Spike_V143del          | 298                                                                      |
| Spike_Y144del          | 578                                                                      |
| Spike_Y145del          | 155                                                                      |
| Spike_N211del          | 90                                                                       |
| Spike_L212I            | 72                                                                       |
| <b>Spike_ins214EPE</b> | <b>0</b>                                                                 |
| Spike_G339D            | 66                                                                       |
| Spike_S371L            | 3                                                                        |
| Spike_S373P            | 64                                                                       |
| Spike_S375F            | 48                                                                       |
| Spike_K417N            | 161                                                                      |
| Spike_N440K            | 92                                                                       |
| Spike_G446S            | 94                                                                       |

|             |      |
|-------------|------|
| Spike_S477N | 264  |
| Spike_T478K | 328  |
| Spike_E484A | 101  |
| Spike_Q493K | 31   |
| Spike_G496S | 21   |
| Spike_Q498R | 38   |
| Spike_N501Y | 338  |
| Spike_Y505H | 16   |
| Spike_T547K | 83   |
| Spike_D614G | 1465 |
| Spike_H655Y | 372  |
| Spike_N679K | 116  |
| Spike_P681H | 376  |
| Spike_N764K | 32   |
| Spike_D796Y | 198  |
| Spike_N856K | 19   |
| Spike_Q954H | 16   |
| Spike_N969K | 26   |
| Spike_L981F | 15   |

**Table S3. List of other insertions near amino acid position 214 of the SARS-CoV-2 Spike glycoprotein.**

SARS-CoV-2 genome sequences and lineage assignments were obtained from GISAID. Insertions occurring between amino acid positions 210 and 218 of the Spike glycoprotein are shown. The table is sorted first by position (first column) in ascending order and then by the genome count (last column) in descending order.

| Spike Protein<br>Amino Acid Position | Insertion   | Lineage   | Number of Genomes in<br>GISAID with Insertion |
|--------------------------------------|-------------|-----------|-----------------------------------------------|
| 210                                  | ins210V     | A.2.5.1   | 1                                             |
| 212                                  | ins212YL    | AY.119    | 1                                             |
| 213                                  | ins213KAR   | B.1.177   | 1                                             |
|                                      | ins213QKRL  | B.1.1.271 | 1                                             |
|                                      | ins213SER   | AY.44     | 1                                             |
| 214                                  | ins214TDR   | B.1.214.2 | 489                                           |
|                                      | ins214QAS   | B.1.639   | 26                                            |
|                                      | ins214ANRN  | P.1       | 11                                            |
|                                      | ins214VPWI  | AY.4      | 9                                             |
|                                      | ins214TDR   | B.1.214   | 6                                             |
|                                      | ins214HSG   | AY.4      | 5                                             |
|                                      | ins214AAG   | A.2.5     | 4                                             |
|                                      | ins214RRAI  | B.1.1     | 4                                             |
|                                      | ins214KFH   | B.1.1.7   | 3                                             |
|                                      | ins214KRI   | B         | 3                                             |
|                                      | ins214NFG   | AY.25     | 3                                             |
|                                      | ins214QID   | B.1.214.2 | 3                                             |
|                                      | ins214AAG   | A.2.5.2   | 2                                             |
|                                      | ins214AQER  | B.1.429   | 2                                             |
|                                      | ins214RLR   | AY.3      | 2                                             |
|                                      | ins214AAG   | A.2.5.1   | 1                                             |
|                                      | ins214AAGGW | B.1.617.2 | 1                                             |
|                                      | ins214AAVE  | AY.4      | 1                                             |
|                                      | ins214AKKN  | B         | 1                                             |
|                                      | ins214APR   | B.1.1.7   | 1                                             |
|                                      | ins214EAR   | B.1.617.2 | 1                                             |
|                                      | ins214ELCD  | AY.124    | 1                                             |
|                                      | ins214GCE   | B.1.625   | 1                                             |
|                                      | ins214GLGG  | B.1.595   | 1                                             |
|                                      | ins214GLKG  | AY.101    | 1                                             |
|                                      | ins214IDR   | B.1.214.2 | 1                                             |
|                                      | ins214KGE   | B.1.1.519 | 1                                             |
|                                      | ins214KLGP  | B.1.177   | 1                                             |
|                                      | ins214KRSD  | B.1.1.519 | 1                                             |
|                                      | ins214NES   | AY.51     | 1                                             |
|                                      | ins214NFGGG | AY.112    | 1                                             |
|                                      | ins214NVAHW | B.1       | 1                                             |

|     |              |           |      |
|-----|--------------|-----------|------|
|     | ins214RGG    | AY.100    | 1    |
|     | ins214SGG    | B.1       | 1    |
|     | ins214SRA    | AY.4.2.1  | 1    |
|     | ins214TDR    | B.1.258   | 1    |
|     | ins214TREA   | B.1.617.2 | 1    |
|     | ins214VRR    | AY.113    | 1    |
| 215 | ins215AGY    | A.2.5     | 1214 |
|     | ins215AGY    | A.2.5.2   | 389  |
|     | ins215AGY    | A.2.5.1   | 177  |
|     | ins215AGY    | A.2.5.3   | 32   |
|     | ins215GGD    | AY.25.1   | 4    |
|     | ins215ADY    | A.2.5     | 3    |
|     | ins215AGAAGY | A.2.5     | 1    |
|     | ins215AGY    | B.1       | 1    |
|     | ins215ARN    | AY.4      | 1    |
|     | ins215DRDR   | B.1.214.2 | 1    |
|     | ins215GRL    | A.2.5.3   | 1    |
|     | ins215KGD    | AY.4.2    | 1    |
|     | ins215KLRS   | A.2.5     | 1    |
|     | ins215QAFD   | AY.47     | 1    |
|     | ins215QMR    | B.1.1.7   | 1    |
|     | ins215RSN    | B.1       | 1    |
|     | ins215SGY    | A.2.5     | 1    |
|     | ins215TGY    | A.2.5     | 1    |
|     | ins215VGY    | A.2.5     | 1    |
|     | ins215VGY    | A.2.5.2   | 1    |
|     | ins215Y      | A.2.5     | 1    |
| 216 | ins216ADL    | B.1.2     | 13   |
| 218 | ins218VF     | B.1.2     | 2    |
|     | ins218VF     | B.1.240   | 1    |

**Table S4. Prevalence of ins214EPE in Omicron sublineages.** Data corresponds to genomes deposited in GISAID and assigned to an Omicron lineage as of July 18, 2022.

| Omicron Sublineage                       | Total Number of Genomes | Number of Genomes Containing ins214EPE | Percent of Genomes Containing ins214EPE |
|------------------------------------------|-------------------------|----------------------------------------|-----------------------------------------|
| BA.1                                     | 2,379,108               | 1,841,765                              | 77.4%                                   |
| BA.2                                     | 1,925,768               | 193                                    | 0.01%                                   |
| BA.3                                     | 1,146                   | 5                                      | 0.4%                                    |
| BA.4                                     | 49,812                  | 1                                      | 0.0%                                    |
| BA.5                                     | 139,679                 | 0                                      | 0.0%                                    |
| B.1.1.529 (not assigned to a sublineage) | 7,355                   | 638                                    | 8.7%                                    |



**Table S5. SARS-CoV-2 insertions identified and attributed to template switching in the previous analysis by Garushyants, et al.** All columns except for the last column are a subset of Supplementary Data 4 from the prior analysis.<sup>14</sup> With this information, we searched GISAID to identify the specific SARS-CoV-2 genomes in which the insertion and origin sequences were present at the specified locations. These genomes are identified in the last column. These events were considered as “positive controls” to evaluate whether homology in the preceding and/or subsequent nucleotide sequences are required for the generation of template switch-mediated insertions in SARS-CoV-2.

| Insertion Sequence<br>(5' to 3' on positive-sense strand) | Origin Sequence<br>(5' to 3' on positive-sense strand) | Insertion Size<br>(Nucleotides) | Insertion Genomic Position | Origin Genomic Position | Origin on Forward or Reverse Strand | Pango Lineage(s)  | GISAID Sequence IDs Matching Description of Insertion from Garushyants et al. |
|-----------------------------------------------------------|--------------------------------------------------------|---------------------------------|----------------------------|-------------------------|-------------------------------------|-------------------|-------------------------------------------------------------------------------|
| aatgtcgcgcattgg                                           | AATGTCGCGCAT<br>TGG                                    | 15                              | 27631                      | 29216                   | Forward                             | B.1.408           | EPI_ISL_731651                                                                |
| tctgttttgctt                                              | TCTGTTTTGCTT                                           | 12                              | 9350                       | 12006                   | Forward                             | B.1.2             | EPI_ISL_1027726                                                               |
|                                                           |                                                        |                                 |                            |                         |                                     |                   | EPI_ISL_1028611                                                               |
|                                                           |                                                        |                                 |                            |                         |                                     |                   | EPI_ISL_1077450                                                               |
|                                                           |                                                        |                                 |                            |                         |                                     |                   | EPI_ISL_2191470                                                               |
|                                                           |                                                        |                                 |                            |                         |                                     |                   | EPI_ISL_2201947                                                               |
| agaaatgcctgt                                              | AGAAATGCCCG<br>T                                       | 12                              | 29442                      | 20018                   | Forward                             | B.1.1.519         | EPI_ISL_2184872                                                               |
|                                                           |                                                        |                                 |                            |                         |                                     | B.1.1             | EPI_ISL_2184874                                                               |
|                                                           |                                                        |                                 |                            |                         |                                     | B.1.1.519         | EPI_ISL_2615927                                                               |
| ggagttcatgct                                              | GGAGTTCATGCT                                           | 12                              | 6638                       | 10562                   | Forward                             | B.1.1.7           | EPI_ISL_1924455                                                               |
| ctaaattgggta                                              | CTAAATTGGGTA                                           | 12                              | 28002                      | 28166                   | Forward                             | B.1;<br>B.1.1.294 | EPI_ISL_1149442                                                               |

**Table S6. Sequences in the Omicron genome with a single nucleotide mismatch compared to the three candidate insertion sequences.** The reference Omicron genome (EPI\_ISL\_6640916)<sup>39</sup> was obtained from GISAID. Within this genome, we identified all 9-nucleotide sequences that had only one mismatch compared to the three candidate insertion sequences (5'-GAGCCAGAA-3'; 5'-AGCCAGAAG-3'; 5'-GCCAGAAGA-3'). Each hit is shown along with the gene in which it occurs, the genome strand on which it occurs (positive sense genome or negative sense anti-genome), and the within-gene start and end genomic positions. All genomic positions are shown with respect to the positive sense genome.

| Candidate Insertion Sequence (5'→3') | Sequence in Original Omicron Genome with 1 nt Mismatch (5'→3') | SARS-CoV-2 Gene        | Genome Strand | Start Position | End Position |
|--------------------------------------|----------------------------------------------------------------|------------------------|---------------|----------------|--------------|
| GAGCCAGAA                            | GAGCCTGAA                                                      | NS3                    | +             | 715            | 723          |
| GAGCCAGAA                            | GAGCAAGAA                                                      | NSP12                  | -             | 1909           | 1917         |
| GAGCCAGAA                            | GAACCAGAA                                                      | NSP13                  | +             | 1252           | 1260         |
| GAGCCAGAA                            | GAGCAAGAA                                                      | NSP3                   | +             | 466            | 474          |
| GAGCCAGAA                            | GGGCCAGAA                                                      | Nucleocapsid           | +             | 337            | 345          |
| GAGCCAGAA                            | GAGACAGAA                                                      | Nucleocapsid           | +             | 1143           | 1151         |
| GCCAGAAGA                            | ACCAGAAGA                                                      | Envelope (E)           | -             | 216            | 224          |
| GCCAGAAGA                            | GCCAGAGGA                                                      | Membrane (M)           | -             | 158            | 166          |
| GCCAGAAGA                            | GCCTGAAGA                                                      | NS3                    | +             | 717            | 725          |
| GCCAGAAGA                            | TCCAGAAGA                                                      | NS7a                   | -             | 106            | 114          |
| GCCAGAAGA                            | GCCACAAGA                                                      | NSP13                  | +             | 723            | 731          |
| GCCAGAAGA                            | GCAAGAAGA                                                      | NSP3                   | +             | 468            | 476          |
| GCCAGAAGA                            | GCCAGAAGC                                                      | Nucleocapsid           | +             | 339            | 347          |
| GCCAGAAGA                            | GACAGAAGA                                                      | Nucleocapsid           | +             | 1145           | 1153         |
| GCCAGAAGA                            | GCAAGAAGA                                                      | Spike glycoprotein (S) | -             | 3173           | 3181         |
| AGCCAGAAG                            | AGCCAGAGG                                                      | Membrane (M)           | -             | 159            | 167          |
| AGCCAGAAG                            | AGCCTGAAG                                                      | NS3                    | +             | 716            | 724          |
| AGCCAGAAG                            | AGCAAGAAG                                                      | NS3                    | -             | 154            | 162          |
| AGCCAGAAG                            | AGCCACAAG                                                      | NSP1                   | -             | 149            | 157          |
| AGCCAGAAG                            | AGCAAGAAG                                                      | NSP3                   | +             | 467            | 475          |
| AGCCAGAAG                            | AGCCAAAAG                                                      | NSP3                   | -             | 4502           | 4510         |
| AGCCAGAAG                            | AGCCACAAG                                                      | NSP5                   | -             | 694            | 702          |

|           |           |                        |   |      |      |
|-----------|-----------|------------------------|---|------|------|
| AGCCAGAAG | GGCCAGAAG | Nucleocapsid           | + | 338  | 346  |
| AGCCAGAAG | AGACAGAAG | Nucleocapsid           | + | 1144 | 1152 |
| AGCCAGAAG | AACCAGAAG | Spike glycoprotein (S) | - | 2639 | 2647 |

**Table S7. Number of genomes with exact matches to candidate insertions by Pango lineage.** For all three possible 9-nucleotide sequences corresponding to ins214EPE (5'-GAGCCAGAA-3'; 5'-AGCCAGAAG-3'; 5'-GCCAGAAGA-3'), we searched for SARS-CoV-2 genomes in GISAID with exact matches in the genome (positive sense) or anti-genome (negative sense). The number of such matches is shown for each Pango lineage with at least one match. Because Omicron corresponds to the Pango lineage B.1.1.529, other descendants of B.1.1 are shown in red, and B.1.1 itself is shown in red, italics, and bold.

| 5'-GAGCCAGAA-3'       |                   |                       |                   | 5'-AGCCAGAAG-3'       |                   |                       |                   | 5'-GCCAGAAGA-3'       |                   |                       |                   |
|-----------------------|-------------------|-----------------------|-------------------|-----------------------|-------------------|-----------------------|-------------------|-----------------------|-------------------|-----------------------|-------------------|
| Positive (+)<br>sense | No. of<br>genomes | Negative (-)<br>sense | No. of<br>genomes | Positive (+)<br>sense | No. of<br>genomes | Negative (-)<br>sense | No. of<br>genomes | Positive (+)<br>sense | No. of<br>genomes | Negative (-)<br>sense | No. of<br>genomes |
| BA.1                  | 1169              | AY.44                 | 13                | BA.1                  | 1169              | <b>B.1.1.7</b>        | <b>33</b>         | BA.1                  | 1169              | AY.25                 | 196771            |
| AY.47                 | 227               | AY.25                 | 6                 | B.1.177.60            | 27                | <b>B.1.1</b>          | <b>27</b>         | <b>B.1.1.7</b>        | <b>28</b>         | Unassigned            | 1523              |
| AY.4.2.1              | 117               | B.1.177               | 2                 | <b>B.1.1.7</b>        | <b>16</b>         | AY.103                | 20                | B.1.177.60            | 27                | AY.39                 | 352               |
| <b>B.1.1.176</b>      | <b>81</b>         | <b>B.1.1.216</b>      | <b>1</b>          | AY.45                 | 13                | AY.122                | 16                | AY.4                  | 15                | AY.113                | 296               |
| AY.122                | 48                | B.1.582               | 1                 | B.1.617.2             | 8                 | B.1                   | 13                | <b>B.1.1.397</b>      | <b>13</b>         | B.1.617.2             | 269               |
| AY.4                  | 39                | AY.13                 | 1                 | AY.4                  | 6                 | AY.4                  | 11                | AY.45                 | 13                | AY.122                | 258               |
| <b>B.1.1.7</b>        | <b>35</b>         | AY.4                  | 1                 | AY.103                | 5                 | AY.20                 | 10                | B.1.617.2             | 9                 | AY.4                  | 215               |
| P.1.15                | 30                | AY.122                | 1                 | Unassigned            | 4                 | P.1                   | 10                | Unassigned            | 6                 | AY.25.1               | 192               |
| AY.29                 | 30                | B.1.2                 | 1                 | P.1                   | 4                 | B.1.427               | 9                 | AY.44                 | 4                 | AY.43                 | 166               |
| B.1.177.60            | 27                |                       |                   | AY.125                | 3                 | B.1.2                 | 9                 | P.1                   | 4                 | AY.44                 | 147               |
| B.1.2                 | 24                |                       |                   | AY.43                 | 3                 | AY.25                 | 9                 | AY.125                | 3                 | AY.75                 | 110               |
| B.1                   | 23                |                       |                   | AY.44                 | 2                 | AY.39                 | 7                 | AY.43                 | 3                 | AY.46.6               | 100               |
| <b>B.1.1.519</b>      | <b>18</b>         |                       |                   | B.1.177.21            | 1                 | AY.3.1                | 7                 | AY.3                  | 2                 | <b>B.1.1.7</b>        | <b>87</b>         |
| AY.16                 | 18                |                       |                   | <b>B.1.1.39</b>       | <b>1</b>          | AY.44                 | 6                 | AY.36                 | 2                 | AY.120                | 85                |
| AY.45                 | 17                |                       |                   | B.1.320               | 1                 | AY.43                 | 6                 | AY.4.2                | 2                 | AY.103                | 78                |
| B.1.617.2             | 16                |                       |                   | B.40                  | 1                 | AY.3                  | 5                 | AY.46.5               | 1                 | B                     | 66                |
| <b>B.1.1</b>          | <b>14</b>         |                       |                   | B.1.36.8              | 1                 | AY.26                 | 5                 | AY.118                | 1                 | AY.42                 | 65                |
| AY.103                | 13                |                       |                   | AY.4.1                | 1                 | A.21                  | 5                 | AY.39.1               | 1                 | AY.114                | 63                |
| AY.43                 | 12                |                       |                   | AY.46.5               | 1                 | Unassigned            | 4                 | AY.4.2.1              | 1                 | AY.33                 | 55                |
| AY.46                 | 11                |                       |                   | B                     | 1                 | B.1.617.2             | 4                 | B.1                   | 1                 | AY.121                | 47                |
| AY.9                  | 10                |                       |                   | AY.4.2                | 1                 | AY.9.2                | 3                 | AY.25                 | 1                 | AY.92                 | 43                |
| Unassigned            | 8                 |                       |                   | AY.36                 | 1                 | <b>B.1.1.519</b>      | <b>3</b>          | AY.33                 | 1                 | AY.126                | 41                |
| P.1                   | 7                 |                       |                   | <b>B.1.1</b>          | <b>1</b>          | B.1.258.17            | 3                 | AY.122                | 1                 | AY.98.1               | 38                |

|                 |          |  |  |          |   |                  |          |                 |          |         |    |
|-----------------|----------|--|--|----------|---|------------------|----------|-----------------|----------|---------|----|
| AY.44           | 7        |  |  | A.2.5    | 1 | AY.45            | 2        | AY.126          | 1        | AY.45   | 33 |
| AY.14           | 5        |  |  | B.1      | 1 | B.1.177.21       | 2        | AY.29           | 1        | AY.3    | 29 |
| AY.25           | 5        |  |  | AY.4.2.1 | 1 | AY.114           | 2        | AY.4.1          | 1        | B.1     | 27 |
| AY.113          | 4        |  |  | AY.39.1  | 1 | AY.125           | 2        | A.2.5           | 1        | AY.5.4  | 25 |
| AY.75           | 3        |  |  |          |   | B.1.609          | 2        | <b>B.1.1</b>    | <b>1</b> | AY.101  | 24 |
| AY.91           | 3        |  |  |          |   | AY.61            | 2        | B.1.177.77      | 1        | AY.20   | 19 |
| AY.88           | 3        |  |  |          |   | AY.27            | 2        | B.1.36.8        | 1        | AY.88   | 18 |
| AY.127          | 3        |  |  |          |   | P.1.2            | 2        | B.1.320         | 1        | AY.99   | 18 |
| B.1.177.21      | 3        |  |  |          |   | <b>B.1.1.306</b> | <b>2</b> | <b>B.1.1.39</b> | <b>1</b> | AY.99.2 | 17 |
| AY.125          | 3        |  |  |          |   | <b>B.1.1.214</b> | <b>2</b> | B.40            | 1        | AY.108  | 15 |
| AY.3            | 2        |  |  |          |   | B.1.621          | 1        | AY.54           | 1        | AY.102  | 14 |
| AY.100          | 2        |  |  |          |   | AY.77            | 1        |                 |          | AY.22   | 13 |
| B.1.429         | 2        |  |  |          |   | AY.29.1          | 1        |                 |          | AY.46.4 | 12 |
| AY.121          | 2        |  |  |          |   | AY.36            | 1        |                 |          | AY.3.1  | 12 |
| AY.4.2          | 2        |  |  |          |   | B.1.617.1        | 1        |                 |          | AY.124  | 12 |
| B.40            | 2        |  |  |          |   | B.1.36           | 1        |                 |          | B.1.2   | 11 |
| P.1.14          | 2        |  |  |          |   | AY.121           | 1        |                 |          | AY.100  | 10 |
| B.1.36.39       | 2        |  |  |          |   | B.1.582          | 1        |                 |          | AY.106  | 10 |
| AY.4.6          | 2        |  |  |          |   | AY.124           | 1        |                 |          | C.37    | 10 |
| <b>B.1.1.28</b> | <b>2</b> |  |  |          |   | AY.98            | 1        |                 |          | AY.26   | 9  |
| B.1.621.1       | 2        |  |  |          |   | <b>B.1.1.161</b> | <b>1</b> |                 |          | AY.47   | 9  |
| C.30            | 2        |  |  |          |   | B.1.177          | 1        |                 |          | AY.43.3 | 9  |
| AY.4.2.2        | 2        |  |  |          |   | B.1.351          | 1        |                 |          | AY.82   | 7  |
| AY.46.6         | 2        |  |  |          |   | B.1.221.4        | 1        |                 |          | B.1.1   | 7  |
| B.1.221         | 2        |  |  |          |   | <b>B.1.1.269</b> | <b>1</b> |                 |          | AY.93   | 7  |
| AY.98           | 1        |  |  |          |   | B.1.526          | 1        |                 |          | B.1.429 | 7  |
| AY.46.5         | 1        |  |  |          |   | AY.13            | 1        |                 |          | AY.9.2  | 7  |
| AY.36           | 1        |  |  |          |   | <b>B.1.1.271</b> | <b>1</b> |                 |          | AY.85   | 6  |
| AY.39           | 1        |  |  |          |   | <b>B.1.1.449</b> | <b>1</b> |                 |          | AY.43.1 | 6  |
| AY.13           | 1        |  |  |          |   | B.1.596          | 1        |                 |          | AY.119  | 5  |
| AY.122.1        | 1        |  |  |          |   | B.1.637          | 1        |                 |          | AY.70   | 5  |

[illegible]

[illegible]

[illegible]



**Table S8. Number of seasonal or enteric *Coronaviridae* genomes with exact matches to each candidate insertion sequence.** We searched non-SARS-CoV-2 *Coronaviridae* genomes and anti-genomes for exact matches to all three possible 9-nucleotide sequences (5'-GAGCCAGAA-3'; 5'-AGCCAGAAG-3'; 5'-GCCAGAAGA-3') that gave rise to ins214EPE in Omicron. This table shows the number of matches that were identified for each such virus-gene combination with at least one match, along with the strand (positive sense genome or negative sense anti-genome) on which the match was found.

| Candidate Insertion Sequence (5'->3') | Genome Strand | Virus                                 | Gene                             | Number of Genomes with Match |
|---------------------------------------|---------------|---------------------------------------|----------------------------------|------------------------------|
| GCCAGAAGA                             | +             | Human coronavirus OC43                | Nucleocapsid (N)                 | 177                          |
| GCCAGAAGA                             | +             | Human enteric coronavirus strain 4408 | Nucleocapsid (N)                 | 2                            |
| GCCAGAAGA                             | +             | Human coronavirus OC43                | Protein I (internal to N)        | 6                            |
| GAGCCAGAA                             | +             | Human coronavirus OC43                | Replicase polyprotein 1a (ORF1a) | 98                           |
| GAGCCAGAA                             | +             | Human enteric coronavirus strain 4408 | Replicase polyprotein 1a (ORF1a) | 1                            |
| GAGCCAGAA                             | -             | Human coronavirus 229E                | Spike glycoprotein (S)           | 33                           |
| GCCAGAAGA                             | -             | Human coronavirus NL63                | Spike glycoprotein (S)           | 2                            |

**Table S9. Coexpression analysis of ACE2 and ANPEP in single cell RNA-sequencing datasets.** The number and percent of cells in each category expressing ACE2, ANPEP, or both ACE2 and ANPEP are shown, along with the observed to expected ratio of co-expression for the given category. In the first row, “All studies” corresponds to the set of studies that are hosted in the previously described Single Cell application at academia.nferx.com.<sup>46,76</sup> The analyzed enterocytes are derived from a study of ileal biopsies from Crohn’s Disease patients.<sup>78</sup> The analyzed respiratory ciliated cells and FOXN4+ respiratory epithelial cells are derived from a study of nasopharyngeal and bronchial samples from COVID-19 patients and healthy controls.<sup>77</sup>

| Study source (PMID)                                   | Cell Type                           | Number of cells | Cells expressing ACE2 (%) | Cells expressing ANPEP (%) | Cells co-expressing ACE2 and ANPEP (%) | Observed / Expected Ratio |
|-------------------------------------------------------|-------------------------------------|-----------------|---------------------------|----------------------------|----------------------------------------|---------------------------|
| All studies                                           | <i>All cells</i>                    | 2.8M            | 26.7K<br>(0.95%)          | 213.1K<br>(7.6%)           | 13.5K<br>(0.48%)                       | 6.6                       |
| Crohn’s Disease<br>Small Intestine<br>(PMID 31474370) | <i>All cells</i>                    | 32.5K           | 432<br>(1.3%)             | 1.4K<br>(4.3%)             | 403<br>(1.2%)                          | 21.7                      |
|                                                       | Enterocytes                         | 809             | 337<br>(41.7%)            | 757<br>(93.6%)             | 329<br>(40.7%)                         | 1.04                      |
| COVID-19<br>Respiratory Tract<br>(PMID 32591762)      | <i>All cells</i>                    | 135.6K          | 3K<br>(2.2%)              | 15.4K<br>(11.4%)           | 1.5K<br>(1.1%)                         | 4.4                       |
|                                                       | Respiratory ciliated cells          | 5.8K            | 827<br>(14.3%)            | 1.2K<br>(20.7%)            | 217<br>(3.7%)                          | 1.3                       |
|                                                       | FOXN4+ respiratory epithelial cells | 787             | 89<br>(11.3%)             | 302<br>(38.4%)             | 56<br>(7.1%)                           | 1.6                       |

**Table S10. Coexpression analysis of ACE2 and DPP4 in single cell RNA-sequencing datasets.** The number and percent of cells in each category expressing ACE2, DPP4, or both ACE2 and DPP4 are shown, along with the observed to expected ratio of co-expression for the given category. In the first row, “All studies” corresponds to the set of studies that are hosted in the previously described Single Cell application at academia.nferx.com.<sup>46,76</sup> The analyzed enterocytes are derived from a study of ileal biopsies from Crohn’s Disease patients.<sup>78</sup> The analyzed respiratory ciliated cells and FOXN4+ respiratory epithelial cells are derived from a study of nasopharyngeal and bronchial samples from COVID-19 patients and healthy controls.<sup>77</sup>

| Study source (PMID)                                   | Cell Type        | Number of cells | Cells expressing ACE2 (%) | Cells expressing DPP4 (%) | Cells co-expressing ACE2 and DPP4 (%) | Observed / Expected Ratio |
|-------------------------------------------------------|------------------|-----------------|---------------------------|---------------------------|---------------------------------------|---------------------------|
| All studies                                           | <i>All cells</i> | 2.8M            | 26.7K<br>(0.95%)          | 112.5K<br>(4.02%)         | 6.4K<br>(0.23%)                       | 6.0                       |
| Crohn’s Disease<br>Small Intestine<br>(PMID 31474370) | <i>All cells</i> | 32.5K           | 432<br>(1.3%)             | 1.3K<br>(4.9%)            | 175<br>(0.54%)                        | 10.1                      |
|                                                       | Enterocytes      | 809             | 337<br>(41.7%)            | 254<br>(31.4%)            | 153<br>(18.9%)                        | 1.4                       |

**Table S11. Local alignment and homology scores for nucleotides upstream or downstream of origin and insertion sites from previously identified template switch-mediated insertions.** These correspond to five “positive control” SARS-CoV-2 template switch-mediated insertions shown in Table S6, which were identified in the prior analysis by Garushyants, et al.<sup>14</sup> We identified the SARS-CoV-2 genomes in GISAID corresponding to each insertion, and then calculated normalized homology scores (NHS) for the 35 or 7 nucleotides upstream or downstream from each insertion and origin sequence. The scores along with the alignments are shown here, and the scores are compared to a null distribution of NHS values computed between 10,000 pairs of randomly selected non-overlapping 35- or 7-nucleotide sequences from the reference SARS-CoV-2 genome in **Figure S3**.

| Insertion Sequence (5' to 3') | Sequence IDs        | Upstream Normalized Homology Score (35 nt Score; 7-nt Score) | Downstream Normalized Homology Score (35-nt Score; 7-nt Score) | Upstream Alignment (5'to 3')                                                                                                             | Downstream Alignment (5' to 3')                                                                                                       |
|-------------------------------|---------------------|--------------------------------------------------------------|----------------------------------------------------------------|------------------------------------------------------------------------------------------------------------------------------------------|---------------------------------------------------------------------------------------------------------------------------------------|
| AATGTCGC<br>GCATTGG           | EPI_ISL_7316<br>51  | 57.14;<br>42.86                                              | 60;<br>42.86                                                   | TGACGGCGTAA-AA----C---A-CGTCTATCAGTTACGTG-C-CA--<br>                             <br>----GC---ACAAATTGCCCCACGCG-CT-TCAG---CGT-TCCTC-GG   | AAC-TGTTT-ATCAGA-CA-A----GAGGAA-GT-TCAA-GAACT-T<br>                             <br>--CATG---GA--AG-TCACACCTTCG-GGAACGTGGT---TG-AC-CT |
| TCTGTTTT<br>GCTT              | EPI_ISL_1027<br>726 | 62.86;<br>71.43                                              | 62.86;<br>57.14                                                | TTTCTGTGG--TGTAGATGC-TGT---AAA---T--TT--ACTTACTA-<br>                             <br>---C--T--ACTG-A-A-GCCT-TTGAAAAAATGGTTTCAC-TACT-T   | AT--ATG-----T-T-TAC-ACCACTAATT-CAAC-CTATTGGTGCT<br>                             <br>-TCCATGCAGGGTGCTGTA-GA-CA-TAA--ACAA-GC--TT--TG--  |
|                               | EPI_ISL_1028<br>611 | 62.86;<br>71.43                                              | 62.86;<br>57.14                                                | TTTCTGTGG--TGTAGATGC-TGT---AAA---T--TT--ACTTACTA-<br>                             <br>---C--T--ACTG-A-A-GCCT-TTGAAAAAATGGTTTCAC-TACT-T   | AT--ATG-----T-T-TAC-ACCACTAATT-CAAC-CTATTGGTGCT<br>                             <br>-TCCATGCAGGGTGCTGTA-GA-CA-TAA--ACAA-GC--TT--TG--  |
|                               | EPI_ISL_1077<br>450 | 62.86;<br>71.43                                              | 62.86;<br>57.14                                                | TTTCTGTGG--TGTAGATGC-TGT---AAA---T--TT--ACTTACTA-<br>                             <br>---C--T--ACTG-A-A-GCCT-TTGAAAAAATGGTTTCAC-TACT-T   | AT--ATG-----T-T-TAC-ACCACTAATT-CAAC-CTATTGGTGCT<br>                             <br>-TCCATGCAGGGTGCTGTA-GA-CA-TAA--ACAA-GC--TT--TG--  |
|                               | EPI_ISL_2191<br>470 | 62.86;<br>71.43                                              | 62.86;<br>57.14                                                | TTTCTGTGG--TGTAGATGC-TGT---AAA---T--TT--ACTTACTA-<br>                             <br>---C--T--ACTG-A-A-GCCT-TTGAAAAAATGGTTTCAC-TACT-T   | AT--ATG-----T-T-TAC-ACCACTAATT-CAAC-CTATTGGTGCT<br>                             <br>-TCCATGCAGGGTGCTGTA-GA-CA-TAA--ACAA-GC--TT--TG--  |
|                               | EPI_ISL_2201<br>947 | 62.86;<br>71.43                                              | 62.86;<br>57.14                                                | TTTCTGTGG--TGTAGATGC-TGT---AAA---T--TT--ACTTACTA-<br>                             <br>---C--T--ACTG-A-A-GCCT-TTGAAAAAATGGTTTCAC-TACT-T   | AT--ATG-----T-T-TAC-ACCACTAATT-CAAC-CTATTGGTGCT<br>                             <br>-TCCATGCAGGGTGCTGTA-GA-CA-TAA--ACAA-GC--TT--TG--  |
| AGAAATG<br>CCTGT              | EPI_ISL_2184<br>872 | 54.29;<br>28.57                                              | 62.86;<br>85.71                                                | ---ACTC---A-AGCCTTACCGCA-GAGA-CAGAAGAAAC-AG-C-A---<br>                             <br>TTGA-T-GGTAGAG--TT--G-ATG-G-TC--AAG---TAGACTTATTT | AACGTGACTC-TTCTTCC-TGCTG-CAGATT-TGG-A-TG-----<br>                             <br>AA-TG-G-T-GTTCCT--AT-T-ACAGA---AGGTAGTGTTAAAGG      |
|                               | EPI_ISL_2184<br>874 | 54.29;<br>28.57                                              | 62.86;<br>85.71                                                | ---ACTC---A-AGCCTTACCGCA-GAGA-CAGAAGAAAC-AG-C-A---<br>                             <br>TTGA-T-GGTAGAG--TT--G-ATG-G-TC--AAG---TAGACTTATTT | AACGTGACTC-TTCTTCC-TGCTG-CAGATT-TGG-A-TG-----<br>                             <br>AA-TG-G-T-GTTCCT--AT-T-ACAGA---AGGTAGTGTTAAAGG      |
|                               | EPI_ISL_2615<br>927 | 54.29;<br>28.57                                              | 62.86;<br>85.71                                                | ---ACTC---A-AGCCTTACCGCA-GAGA-CAGAAGAAAC-AG-C-A---<br>                             <br>TTGA-T-GGTAGAG--TT--G-ATG-G-TC--AAG---TAGACTTATTT | AACGTGACTC-TTCTTCC-TGCTG-CAGATT-TGG-A-TG-----<br>                             <br>AA-TG-G-T-GTTCCT--AT-T-ACAGA---AGGTAGTGTTAAAGG      |
| GGAGTTCA<br>TGCT              | EPI_ISL_1924<br>455 | 57.14;<br>57.14                                              | 60;<br>28.57                                                   | ATCTAGAGTATTAGGT-TTGAAA-A-C-CC-T-TGC---T-ACTC---<br>                             <br>--CT---T-TT---TGTT---ACATGCACCATATG-GAATTAC-CAACT   | ATGGTTT-AGCT-G-GTGTTA-ATAGTGTCC--CTTG---GGA-T--<br>                             <br>--GG---CA-C-AGAC--TTAGA-AG-GT--AACTT-TTATGGACCTTT |

|                  |                     |     |     |                                 |                                 |
|------------------|---------------------|-----|-----|---------------------------------|---------------------------------|
| CTAAATTG<br>GGTA | EPI_ISL_1149<br>442 | N/A | N/A | Region had low quality sequence | Region had low quality sequence |
|------------------|---------------------|-----|-----|---------------------------------|---------------------------------|
